# Supplementary figures and images for: Immune landscape and subtypes in primary resectable oral squamous cell carcinoma: prognostic significance and predictive of therapeutic response
Source: HighWire-hosted journal article supplement (doi:10.1136/jitc-2021-002434), 2021-06-01

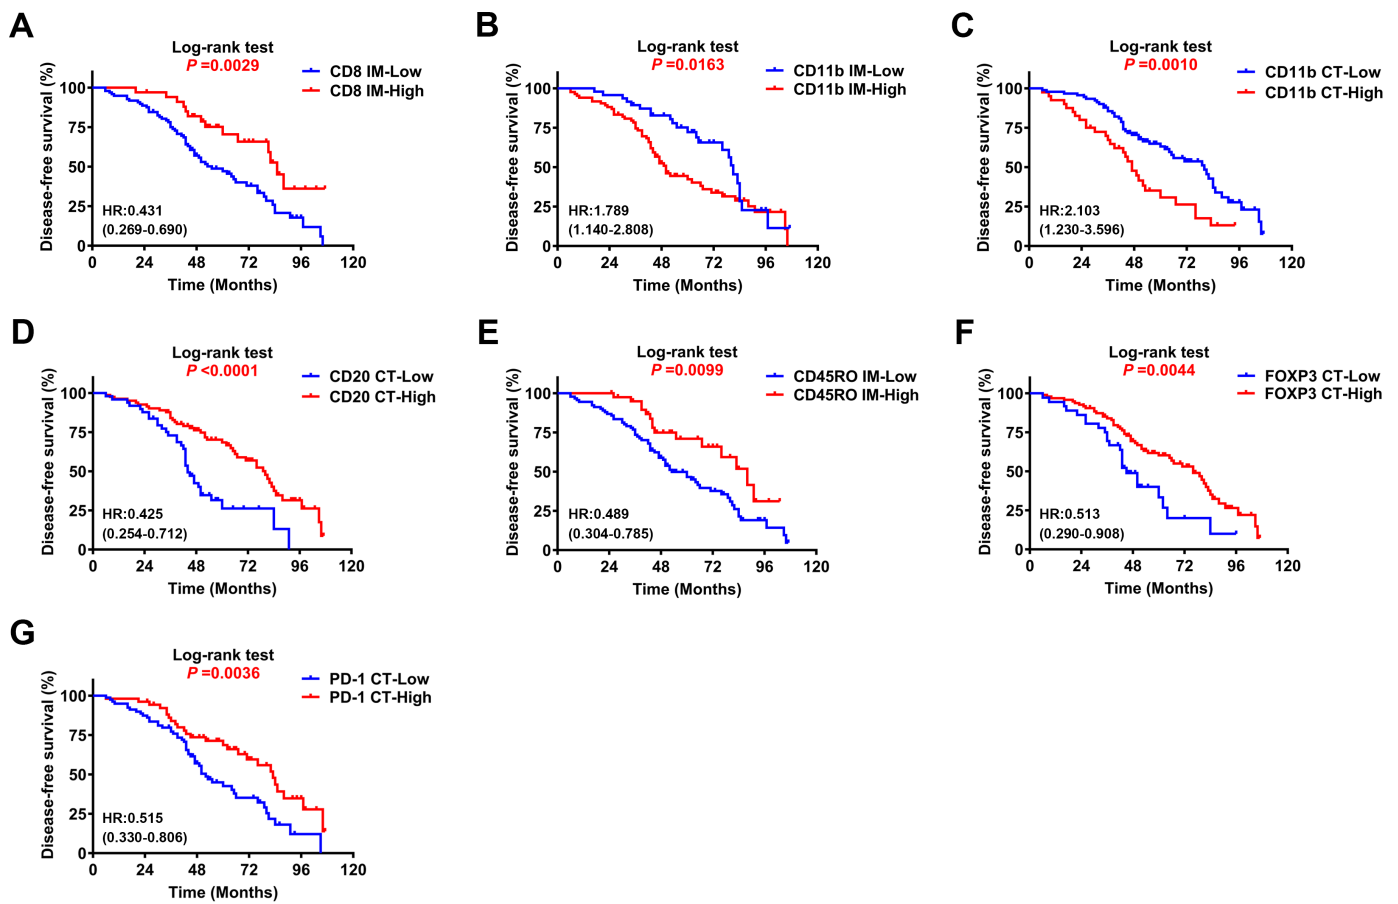

Supplement: jitc-2021-002434supp013_data_supplement.pdf [file jitc-2021-002434supp013_data_supplement.pdf]

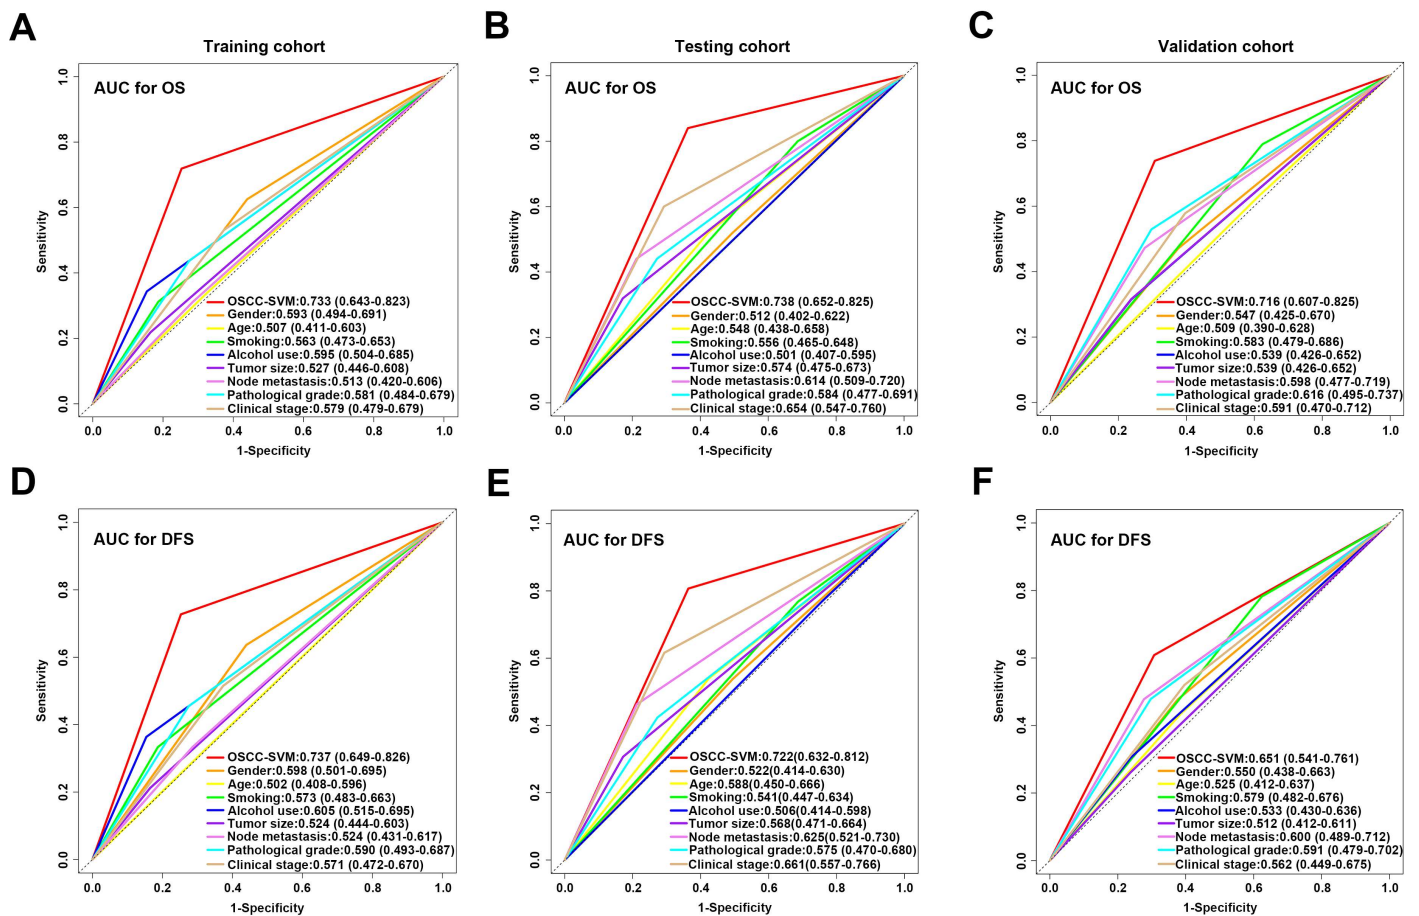

Supplement: jitc-2021-002434supp019_data_supplement.pdf [file jitc-2021-002434supp019_data_supplement.pdf]

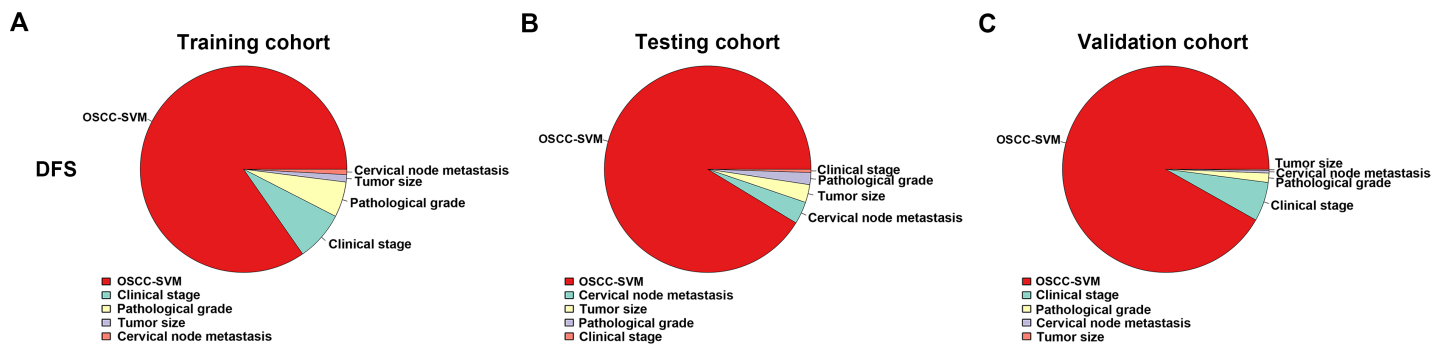

Supplement: jitc-2021-002434supp020_data_supplement.pdf [file jitc-2021-002434supp020_data_supplement.pdf]

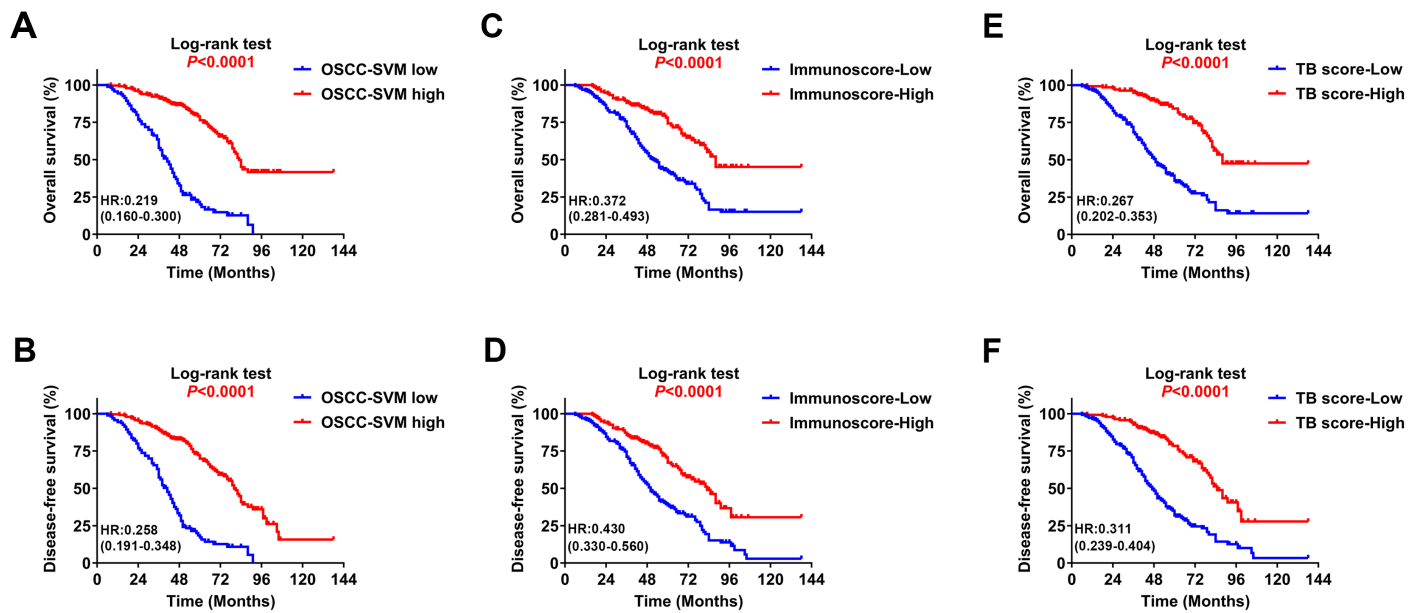

Supplement: jitc-2021-002434supp021_data_supplement.pdf [file jitc-2021-002434supp021_data_supplement.pdf]

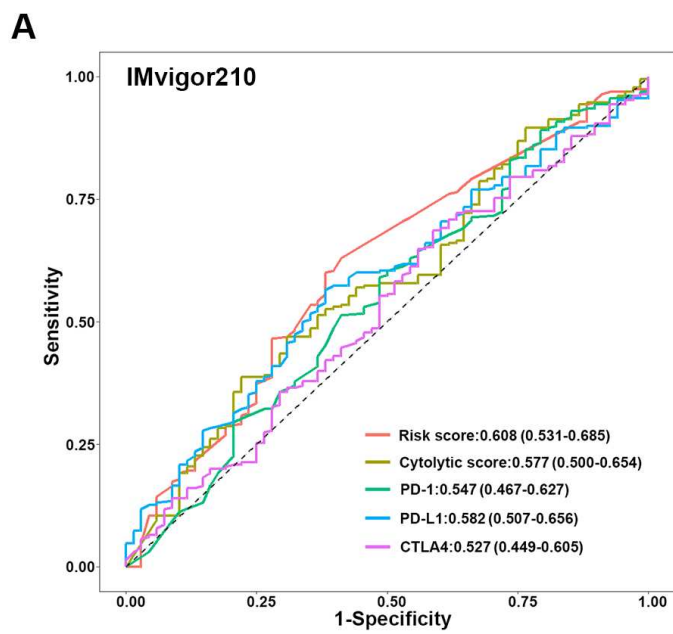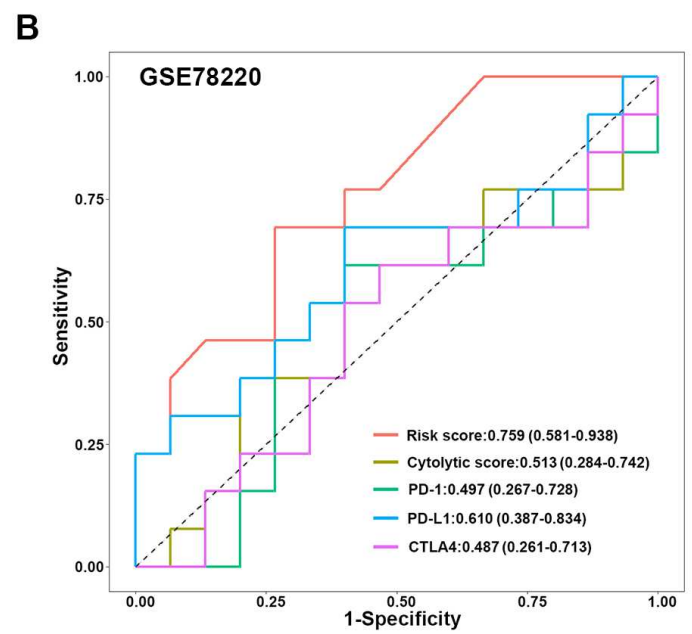

Supplement: jitc-2021-002434supp024_data_supplement.pdf [file jitc-2021-002434supp024_data_supplement.pdf]

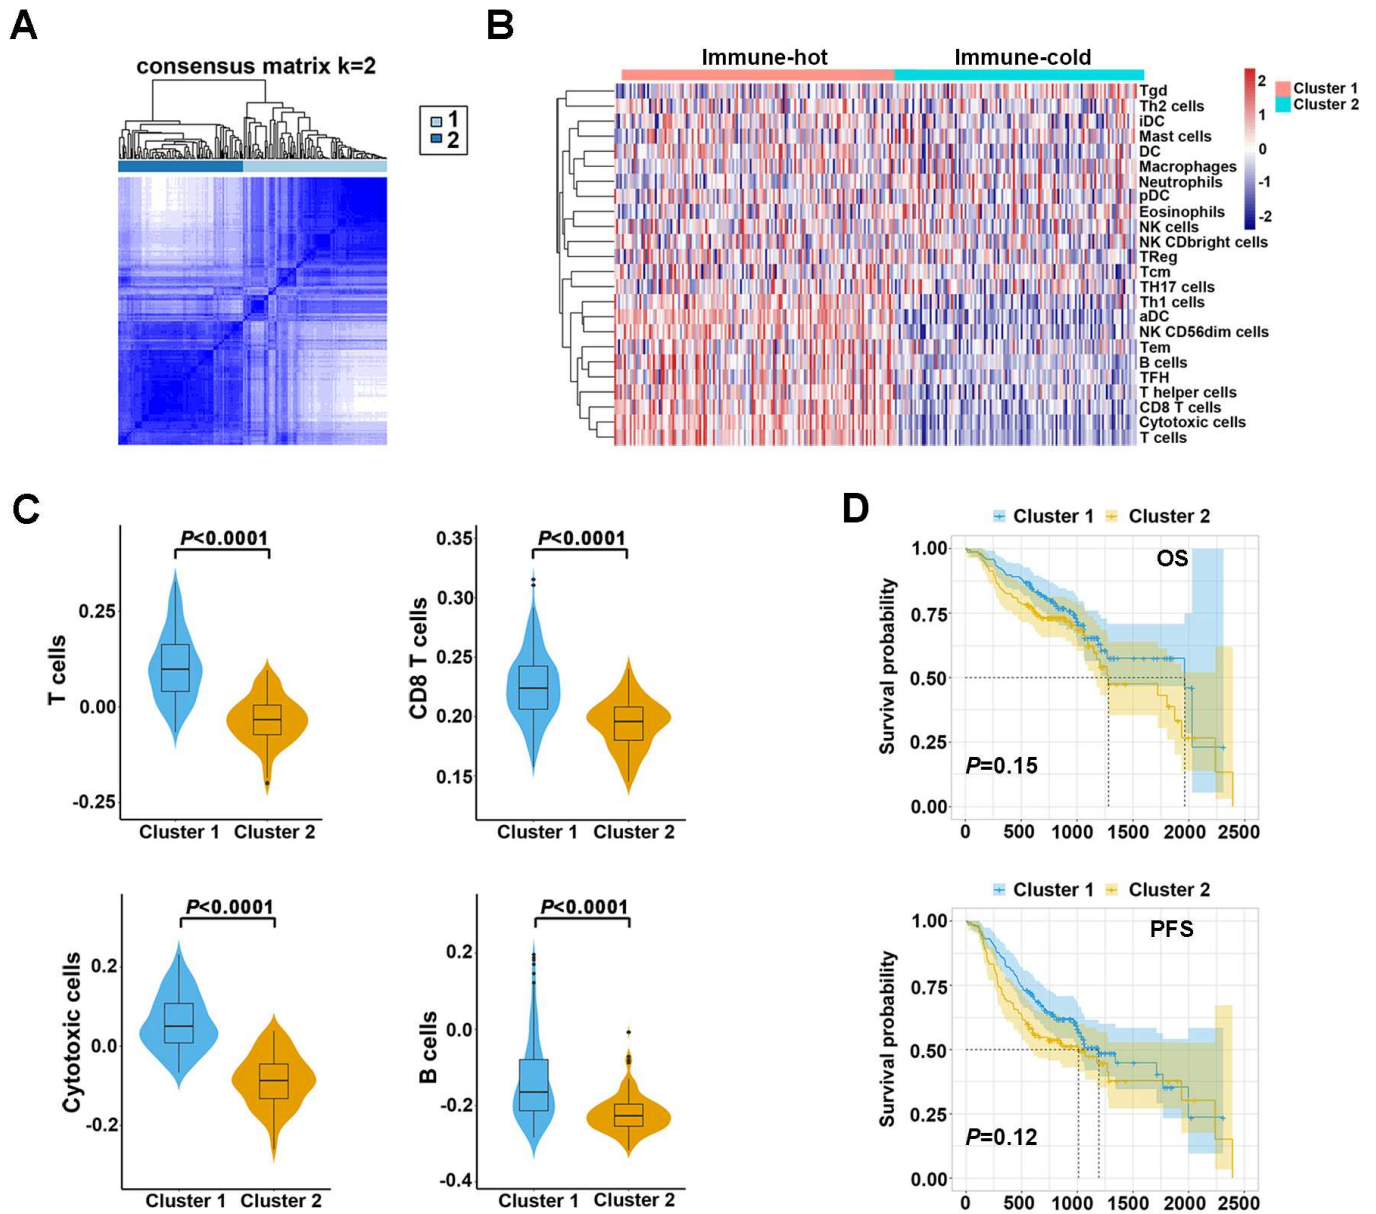

Supplement: jitc-2021-002434supp026_data_supplement.pdf [file jitc-2021-002434supp026_data_supplement.pdf]

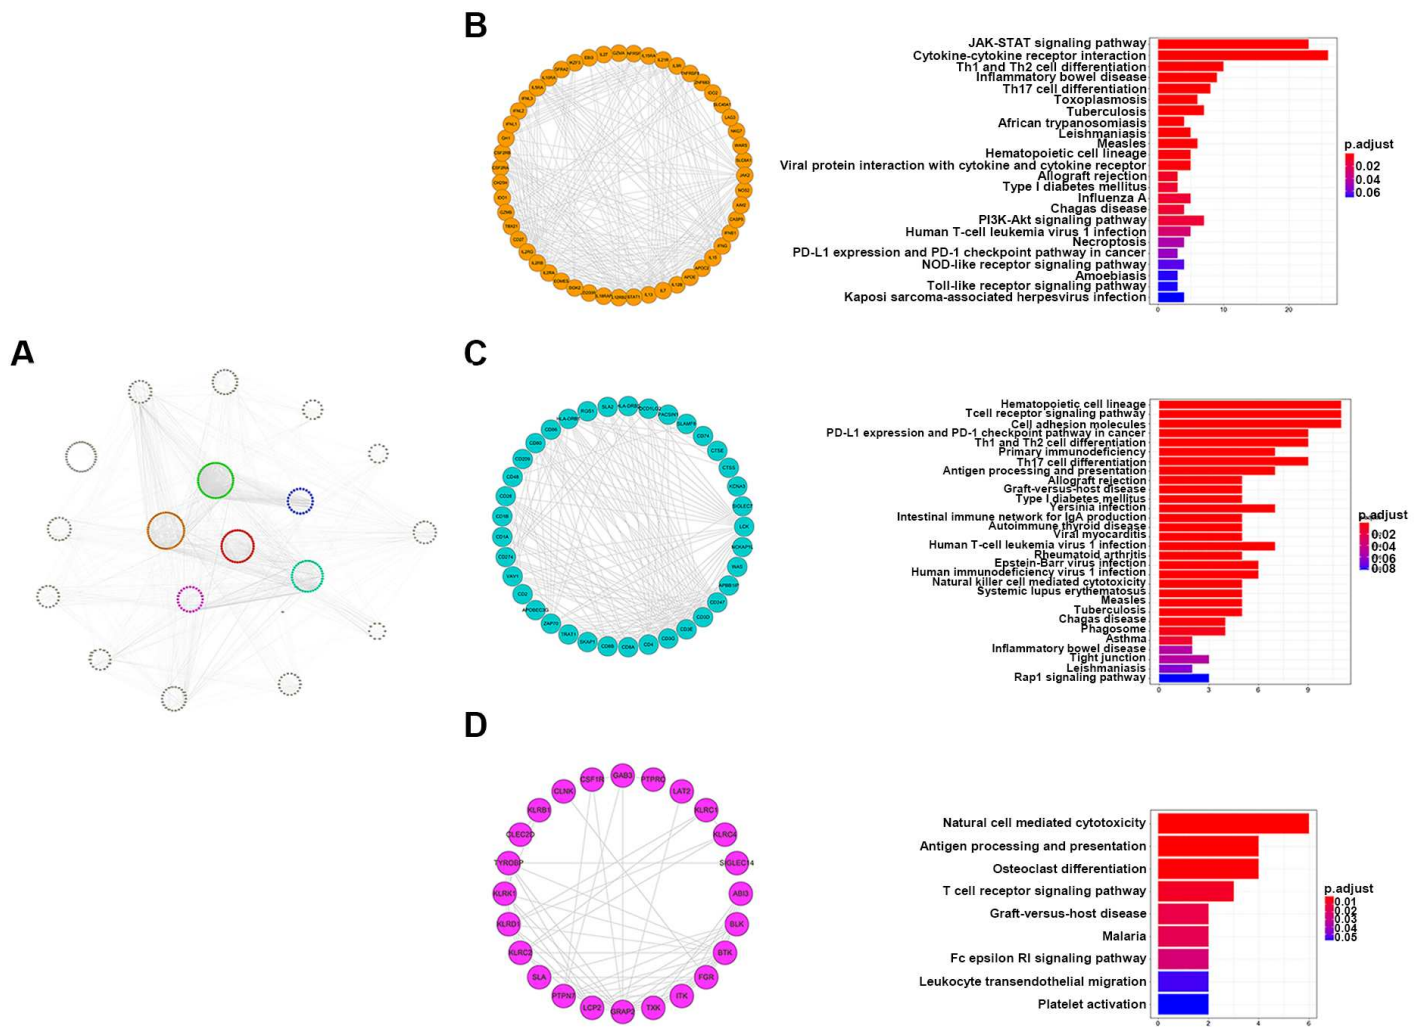

Supplement: jitc-2021-002434supp030_data_supplement.pdf [file jitc-2021-002434supp030_data_supplement.pdf]

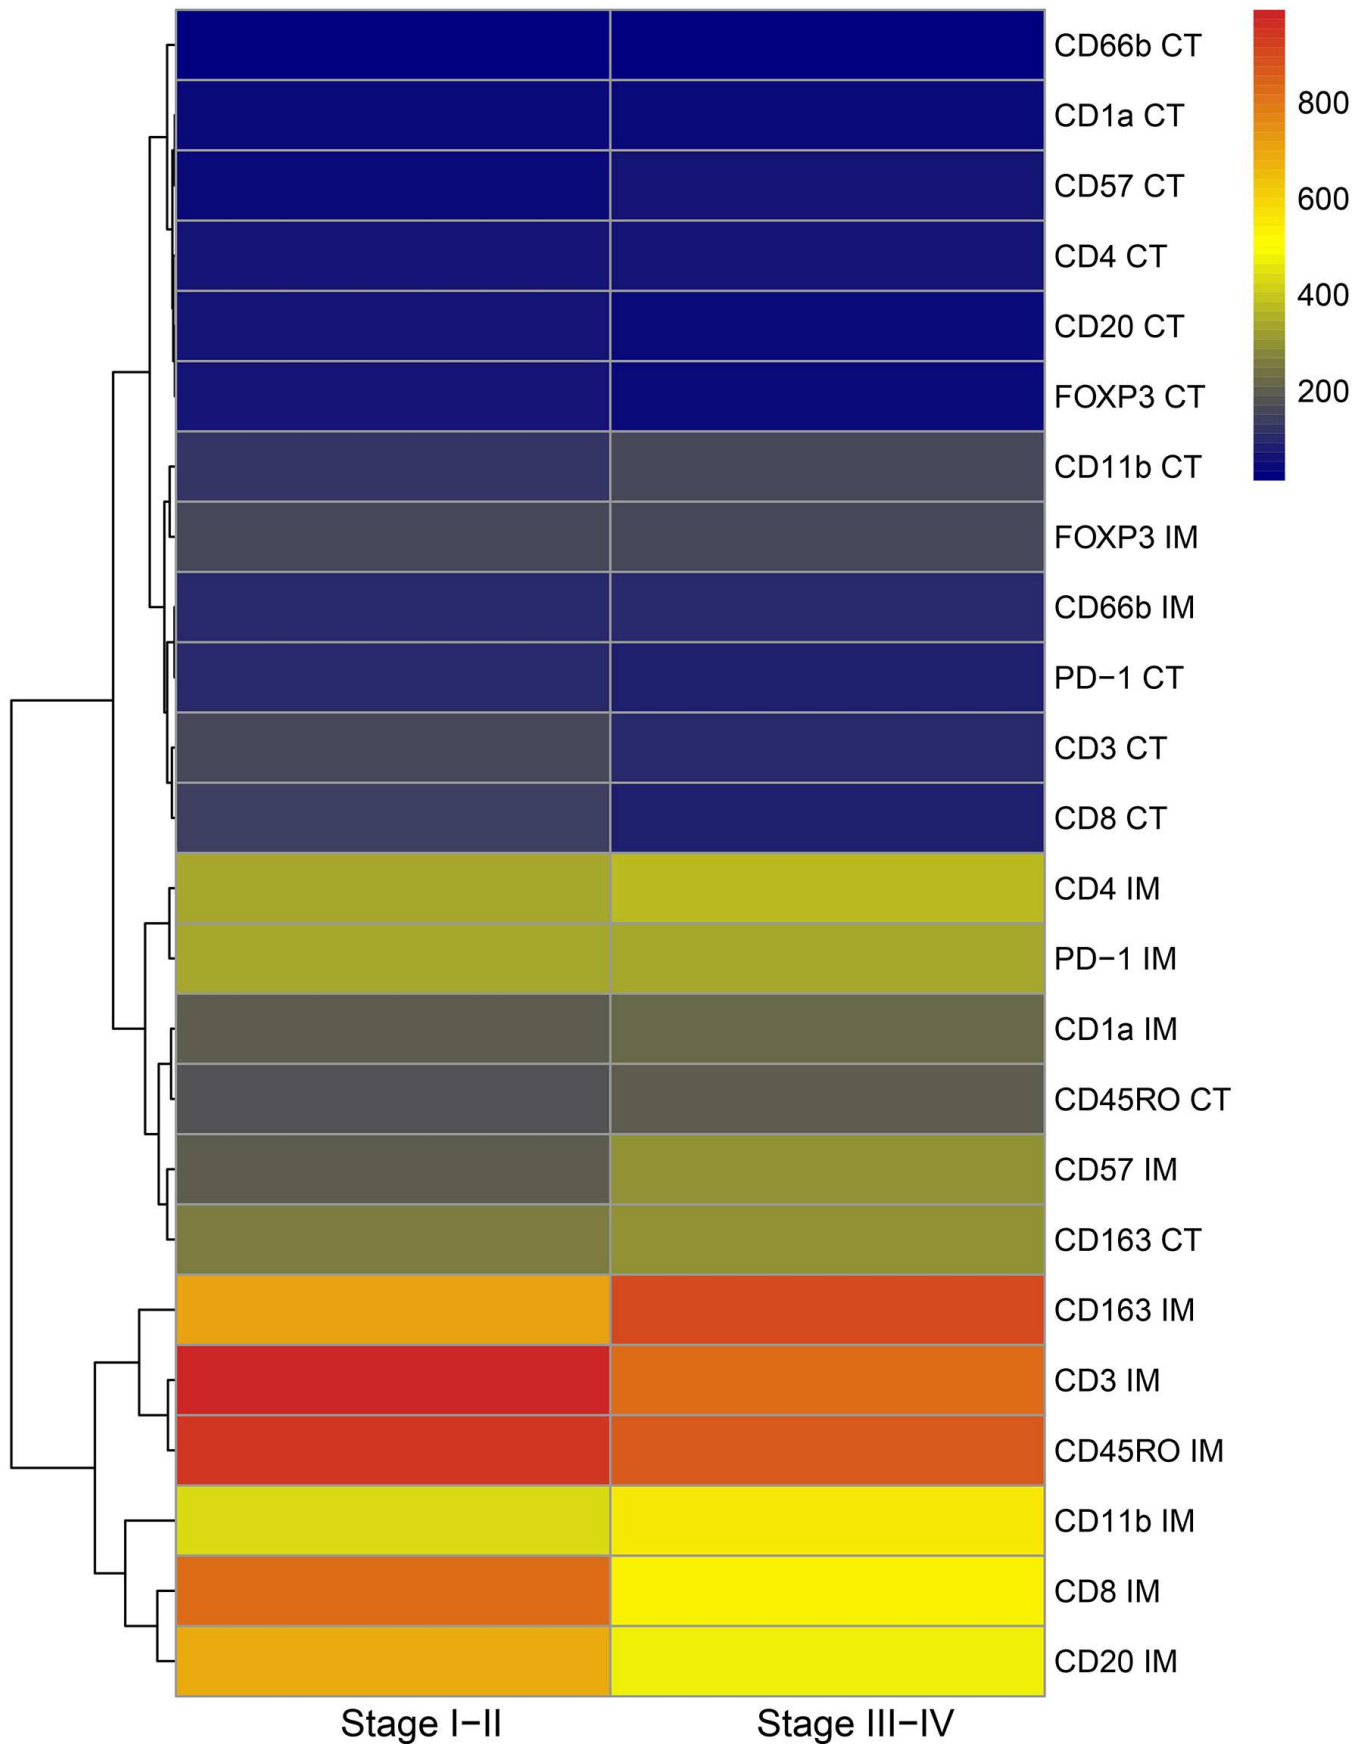

Supplement: jitc-2021-002434supp004_data_supplement.pdf [file jitc-2021-002434supp004_data_supplement.pdf]

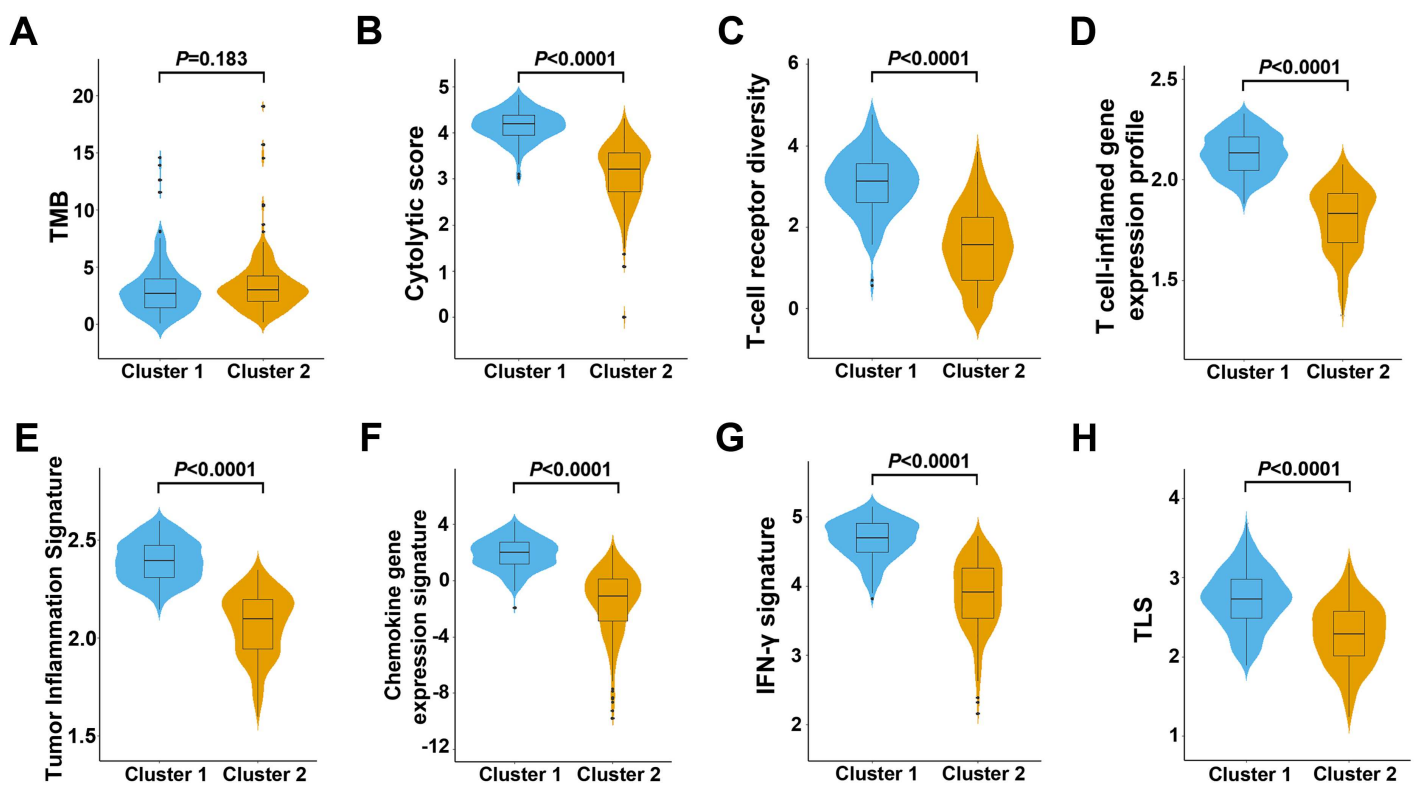

Supplement: jitc-2021-002434supp033_data_supplement.pdf [file jitc-2021-002434supp033_data_supplement.pdf]

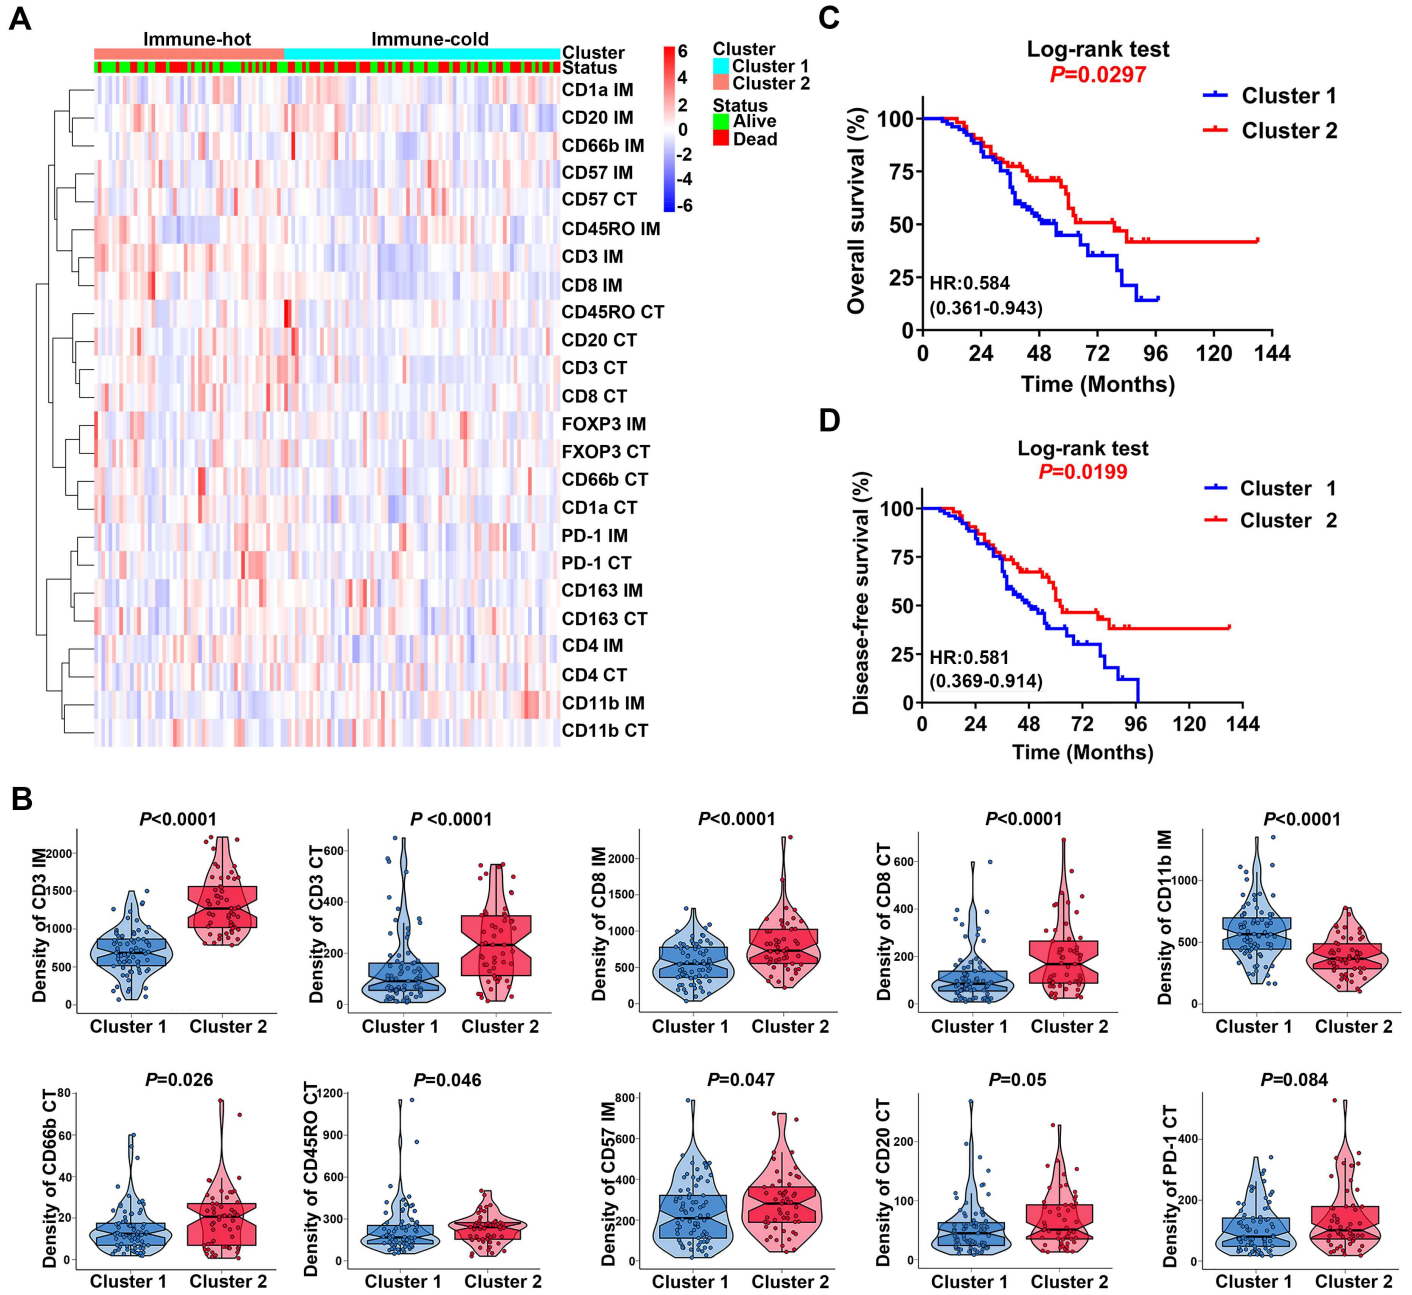

Supplement: jitc-2021-002434supp006_data_supplement.pdf [file jitc-2021-002434supp006_data_supplement.pdf]
